# Supplementary material
Source: PubMed Central journal article supplement (PMC4041799)

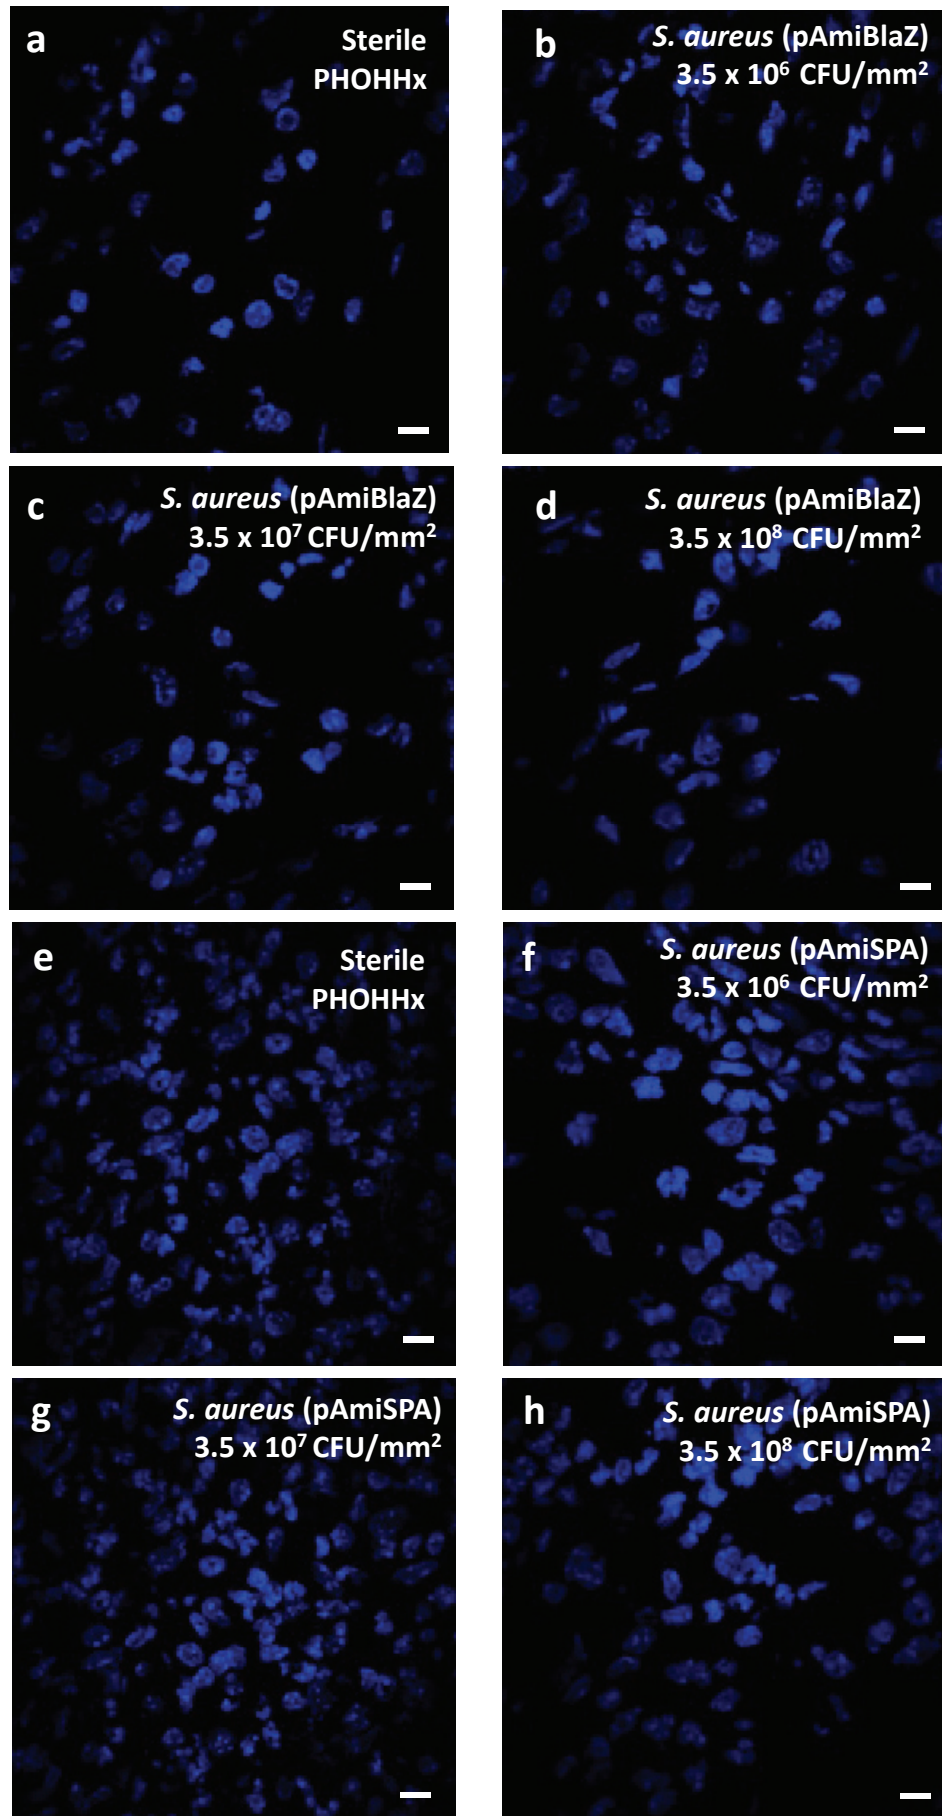

SFig. 1 Dinjaski et al.

Supplement: NIHMS577448-supplement-01.pdf [file NIHMS577448-supplement-01.pdf]
